# Supplementary material for: Combined Influence of Eight Lifestyle Factors on Metabolic Syndrome Incidence: A Prospective Cohort Study from the MECH-HK Study
Source: MDPI journal article supplement (doi:10.3390/nu16040547), 2024-02-16
Supplement: s1 [file s1]

**Table S1. The weight for each component of the combined lifestyle score**

| <b>Component</b>  | <b><math>\beta^a</math></b> | <b>Standard error</b> | <b>Standard <math>\beta^b</math></b> | <b>Proportion <sup>c</sup></b> | <b>Weight <sup>d</sup></b> |
|-------------------|-----------------------------|-----------------------|--------------------------------------|--------------------------------|----------------------------|
| Smoking           | -0.145                      | 0.214                 | -0.689                               | 18.3%                          | 1.462                      |
| Physical activity | -0.079                      | 0.180                 | -0.319                               | 8.5%                           | 0.677                      |
| Sedentary time    | -0.230                      | 0.225                 | -1.156                               | 30.6%                          | 2.452                      |
| Sleep             | -0.030                      | 0.187                 | -0.125                               | 3.3%                           | 0.266                      |
| Stress            | -0.104                      | 0.181                 | -0.420                               | 11.1%                          | 0.891                      |
| Fatigue           | -0.230                      | 0.191                 | -0.980                               | 26.0%                          | 2.079                      |
| Diet              | -0.011                      | 0.174                 | -0.042                               | 1.1%                           | 0.090                      |
| Alcohol           | -0.011                      | 0.169                 | -0.040                               | 1.1%                           | 0.085                      |

<sup>a</sup>: Age, marital status, living condition, educational level, family income, employment status, menstrual age, menolipsis, hypertension, hyperlipidaemia, cancer, general obesity, and the other components of the combined lifestyle score were adjusted in multivariable analyses.

<sup>b</sup>: Standardized  $\beta = \beta \times \text{SD of the exposure} / \text{SD of the outcome}$ ; In logistic regression, the SD of the outcome is  $\pi / \sqrt{3} = 1.8138$ .

<sup>c</sup>: Proportion = Standardized  $\beta_i / (\sum \text{Standardized } \beta_i)$ .

<sup>d</sup>: Weight<sub>*i*</sub> = [Standardized  $\beta_i / (\sum \text{Standardized } \beta_i)] \times 8$ .

**Table S2. Sensitivity analyses for the associations of combined lifestyle score with the incidence of metabolic syndrome**

| Exposure                                        | N <sub>case</sub> | N <sub>total</sub> | Incidence | Model I <sup>a</sup> |        | Model II <sup>b</sup> |        |
|-------------------------------------------------|-------------------|--------------------|-----------|----------------------|--------|-----------------------|--------|
|                                                 |                   |                    |           | OR (95% CI)          | P      | OR (95% CI)           | P      |
| Overall                                         | 179               | 1,634              | 11.0%     |                      |        |                       |        |
| Combined lifestyle score                        |                   |                    |           |                      |        |                       |        |
| 0-3 points                                      | 79                | 618                | 12.8%     | Referent             |        | Referent              |        |
| 4 points                                        | 42                | 366                | 11.5%     | 0.84 (0.56, 1.26)    | 0.406  | 0.91 (0.59, 1.38)     | 0.646  |
| 5 points                                        | 29                | 309                | 9.4%      | 0.59 (0.37, 0.93)    | 0.024  | 0.58 (0.36, 0.94)     | 0.027  |
| 6-8 points                                      | 29                | 341                | 8.5%      | 0.56 (0.36, 0.88)    | 0.012  | 0.53 (0.33, 0.86)     | 0.010  |
| Combined lifestyle score (no smoking)           |                   |                    |           |                      |        |                       |        |
| 0-2 points                                      | 70                | 552                | 12.7%     | Referent             |        | Referent              |        |
| 3 points                                        | 46                | 374                | 12.3%     | 0.93 (0.62, 1.39)    | 0.727  | 0.97 (0.64, 1.49)     | 0.904  |
| 4 points                                        | 35                | 344                | 10.2%     | 0.65 (0.42, 1.01)    | 0.056  | 0.63 (0.40, 1.01)     | 0.053  |
| 5-7 points                                      | 28                | 364                | 7.7%      | 0.53 (0.33, 0.84)    | 0.007  | 0.52 (0.32, 0.85)     | 0.009  |
| Combined lifestyle score (no physical activity) |                   |                    |           |                      |        |                       |        |
| 0-2 points                                      | 61                | 476                | 12.8%     | Referent             |        | Referent              |        |
| 3 points                                        | 49                | 400                | 12.3%     | 0.95 (0.63, 1.43)    | 0.807  | 1.01 (0.66, 1.55)     | 0.956  |
| 4 points                                        | 38                | 388                | 9.8%      | 0.65 (0.42, 1.00)    | 0.053  | 0.63 (0.40, 1.00)     | 0.050  |
| 5-7 points                                      | 31                | 370                | 8.4%      | 0.57 (0.36, 0.90)    | 0.016  | 0.58 (0.36, 0.94)     | 0.027  |
| Combined lifestyle score (no sedentary time)    |                   |                    |           |                      |        |                       |        |
| 0-2 points                                      | 48                | 366                | 13.1%     | Referent             |        | Referent              |        |
| 3 points                                        | 35                | 307                | 11.4%     | 0.84 (0.53, 1.34)    | 0.469  | 0.76 (0.46, 1.25)     | 0.276  |
| 4 points                                        | 45                | 380                | 11.8%     | 0.83 (0.53, 1.29)    | 0.405  | 0.82 (0.52, 1.29)     | 0.386  |
| 5-7 points                                      | 51                | 581                | 8.8%      | 0.55 (0.36, 0.84)    | 0.006  | 0.52 (0.33, 0.81)     | 0.004  |
| Combined lifestyle score (no sleep)             |                   |                    |           |                      |        |                       |        |
| 0-2 points                                      | 64                | 414                | 15.5%     | Referent             |        | Referent              |        |
| 3 points                                        | 38                | 361                | 10.5%     | 0.67 (0.44, 1.04)    | 0.074  | 0.60 (0.38, 0.95)     | 0.028  |
| 4 points                                        | 40                | 437                | 9.2%      | 0.50 (0.33, 0.77)    | 0.001  | 0.47 (0.30, 0.73)     | 0.001  |
| 5-7 points                                      | 37                | 422                | 8.8%      | 0.44 (0.28, 0.68)    | <0.001 | 0.42 (0.26, 0.67)     | <0.001 |
| Combined lifestyle score (no stress)            |                   |                    |           |                      |        |                       |        |
| 0-2 points                                      | 57                | 435                | 13.1%     | Referent             |        | Referent              |        |

| Exposure                              | N <sub>case</sub> | N <sub>total</sub> | Incidence | Model I <sup>a</sup> |       | Model II <sup>b</sup> |       |
|---------------------------------------|-------------------|--------------------|-----------|----------------------|-------|-----------------------|-------|
|                                       |                   |                    |           | OR (95% CI)          | P     | OR (95% CI)           | P     |
| 3 points                              | 46                | 385                | 11.9%     | 0.95 (0.62, 1.44)    | 0.802 | 0.88 (0.56, 1.37)     | 0.561 |
| 4 points                              | 38                | 393                | 9.7%      | 0.63 (0.41, 0.98)    | 0.040 | 0.57 (0.36, 0.91)     | 0.017 |
| 5-7 points                            | 38                | 421                | 9.0%      | 0.62 (0.40, 0.96)    | 0.031 | 0.63 (0.40, 0.98)     | 0.048 |
| Combined lifestyle score (no fatigue) |                   |                    |           |                      |       |                       |       |
| 0-2 points                            | 52                | 432                | 12.0%     | Referent             |       | Referent              |       |
| 3 points                              | 43                | 362                | 11.9%     | 1.03 (0.66, 1.58)    | 0.911 | 0.91 (0.58, 1.44)     | 0.686 |
| 4 points                              | 46                | 436                | 10.6%     | 0.82 (0.53, 1.25)    | 0.350 | 0.74 (0.47, 1.16)     | 0.187 |
| 5-7 points                            | 38                | 404                | 9.4%      | 0.67 (0.43, 0.99)    | 0.048 | 0.58 (0.36, 0.93)     | 0.023 |
| Combined lifestyle score (no diet)    |                   |                    |           |                      |       |                       |       |
| 0-2 points                            | 49                | 380                | 12.9%     | Referent             |       | Referent              |       |
| 3 points                              | 44                | 366                | 12.0%     | 0.96 (0.62, 1.49)    | 0.861 | 0.86 (0.54, 1.37)     | 0.530 |
| 4 points                              | 45                | 396                | 11.4%     | 0.85 (0.55, 1.31)    | 0.456 | 0.77 (0.49, 1.22)     | 0.266 |
| 5-7 points                            | 41                | 492                | 8.3%      | 0.55 (0.35, 0.85)    | 0.008 | 0.49 (0.31, 0.79)     | 0.003 |
| Combined lifestyle score (no alcohol) |                   |                    |           |                      |       |                       |       |
| 0-2 points                            | 48                | 368                | 13.0%     | Referent             |       | Referent              |       |
| 3 points                              | 50                | 430                | 11.6%     | 0.95 (0.62, 1.46)    | 0.825 | 0.88 (0.56, 1.39)     | 0.588 |
| 4 points                              | 40                | 365                | 11.0%     | 0.78 (0.50, 1.23)    | 0.288 | 0.76 (0.47, 1.22)     | 0.256 |
| 5-7 points                            | 41                | 471                | 8.7%      | 0.56 (0.36, 0.88)    | 0.011 | 0.54 (0.34, 0.86)     | 0.009 |
| Weighted combined lifestyle score     |                   |                    |           |                      |       |                       |       |
| The first quartile (0-2.314)          | 55                | 397                | 13.9%     | Referent             |       | Referent              |       |
| The second quartile (2.314-3.815)     | 50                | 420                | 11.9%     | 0.88 (0.58, 1.33)    | 0.542 | 0.94 (0.61, 1.46)     | 0.778 |
| The third quartile (3.815-5.199)      | 41                | 410                | 10.0%     | 0.63 (0.41, 0.97)    | 0.035 | 0.67 (0.42, 1.06)     | 0.086 |
| The fourth quartile (5.199-8)         | 33                | 407                | 8.1%      | 0.46 (0.29, 0.73)    | 0.001 | 0.50 (0.31, 0.82)     | 0.005 |

OR, odds ratio; CI, confidence interval.

<sup>a</sup>: Model I adjusted for age.

<sup>b</sup>: Model II adjusted for age, marital status, living condition, educational level, family income, employment status, menstrual age, menolipsis, hypertension, hyperlipidaemia, cancer, and general obesity.
